# Supplementary material for: Evidence mapping for decision making: feasibility versus accuracy – when to abandon high sensitivity in electronic searches
Source: PubMed Central journal article supplement (PMC4951635; doi:10.3205/000236), 2016-07-19
Supplement: GMS-14-09-s-001.pdf [file GMS-14-09-s-001.pdf]

## Appendix: Search strategies

This appendix has been provided by the authors to give readers additional information about their work.

### Sensitive search string

Databases: Embase/Medline, interface Elsevier

| Blocks                                                                | Search terms                                                                                                                                                                                                                                                                                                                                                                                                                                                                                                                                                                                                                                                                                                                                                                                                                                                                                                                                                                                                                                                                                                                                       |
|-----------------------------------------------------------------------|----------------------------------------------------------------------------------------------------------------------------------------------------------------------------------------------------------------------------------------------------------------------------------------------------------------------------------------------------------------------------------------------------------------------------------------------------------------------------------------------------------------------------------------------------------------------------------------------------------------------------------------------------------------------------------------------------------------------------------------------------------------------------------------------------------------------------------------------------------------------------------------------------------------------------------------------------------------------------------------------------------------------------------------------------------------------------------------------------------------------------------------------------|
| 1 Diabetes                                                            | 'diabetes mellitus' OR diabetes OR zuckerkrankheit OR<br><br><b>EMTREE:</b><br><br>'diabetes mellitus'/syn                                                                                                                                                                                                                                                                                                                                                                                                                                                                                                                                                                                                                                                                                                                                                                                                                                                                                                                                                                                                                                         |
| 2 Complications                                                       | hypoglyc*mia* OR hyperglyc*mia* OR 'diabetic ketoacidosis' OR 'coma diabeticum' OR 'diabetic retinopathy' OR 'diabetic neuropathy' OR hypoglyk*mie* OR hyperglyk*mie* OR hypoglyc*mie* OR hyperglyc*mie* OR 'diabetische ketoazidose' OR 'diabetische ketoacidose' OR 'diabetisches koma' OR bewusstseinsverlust OR 'diabetische retinopathie' OR sehverschlechterung* OR 'diabetische neuropathie' OR 'diabetic foot' OR 'diabetischer fuß' OR 'diabetisches fußsyndrom' OR 'diabetic foot syndrome' OR ('loss of consciousness' OR 'visual impairment' AND 'diabetes mellitus'/syn) OR<br><br><b>EMTREE:</b><br><br>'hypoglycemia'/syn OR 'hyperglycemia'/syn OR 'diabetic ketoacidosis'/syn OR 'diabetic coma'/syn OR 'diabetic retinopathy'/syn OR ('visual impairment'/syn AND 'diabetes mellitus'/syn) OR 'diabetic neuropathy'/syn OR 'diabetic foot'/syn                                                                                                                                                                                                                                                                                   |
| 3 Driving                                                             | car NEAR/1 driv* OR automobile NEAR/1 driv* OR 'motor vehicle' NEAR/1 driv* OR driving NEAR/1 licen?e* OR driver* NEAR/1 licen?e* OR 'automobile driver examination' OR 'driving ability' OR 'driving performance' OR driving NEAR/1 pattern* OR 'unsafe driving' OR 'driving impairment' OR 'driving safety' OR 'traffic safety' OR roadworthiness OR unroadworthy OR car NEAR/1 crash* OR traffic NEAR/1 collision* OR road NEAR/1 accident* OR traffic NEAR/1 accident* OR automobile NEAR/1 accident* OR 'motor vehicle' NEAR/1 accident* OR 'motor vehicle related injury' OR 'risk of injury' OR kraftfahrzeug* OR autofahrer OR autofahren OR fùhrerschein OR fuehrerschein OR fahrerlaubnis OR fùhrerscheinuntersuchung* OR fuehrerscheinuntersuchung* OR fahrt*chtig* OR fahrunt*chtig* OR verkehrst*chtig* OR verkehrssicherheit OR kollision* OR zusammensto* OR verkehrsunf*ll* OR verletzungsrisiko OR 'impaired driving' OR roadworthy OR 'road safety' OR car NEAR/1 accident* OR<br><br><b>EMTREE:</b><br><br>'driving ability'/syn OR 'car driving'/syn OR 'driver licence'/syn OR 'traffic safety'/syn OR 'traffic accident'/syn |
| (1 OR 2) AND 3 AND [2002-2014]/py AND ([english]/lim OR [german]/lim) |                                                                                                                                                                                                                                                                                                                                                                                                                                                                                                                                                                                                                                                                                                                                                                                                                                                                                                                                                                                                                                                                                                                                                    |

**Specific search string**, interface Elsevier: (diabetes mellitus/ OR hypoglyc\*mia\* OR hyperglyc\*mia\* OR "coma diabeticum" OR "diabetic retinopathy" OR "diabetic neuropathy" OR "diabetic foot"), AND ((automobile NEAR/1 driv\*) OR (driv\* NEAR/1 licen?e\*) OR "driving ability" OR (traffic NEAR/1 accident\*)).
